# Supplementary material for: Lovastatin‐mediated MCF‐7 cancer cell death involves LKB1‐AMPK‐p38MAPK‐p53‐survivin signalling cascade
Source: PubMed Central journal article supplement (PMC6991643; doi:10.1111/jcmm.14879), 2019-12-10

# Supplement Information

## Supplement Figures

Supplement Fig. S1

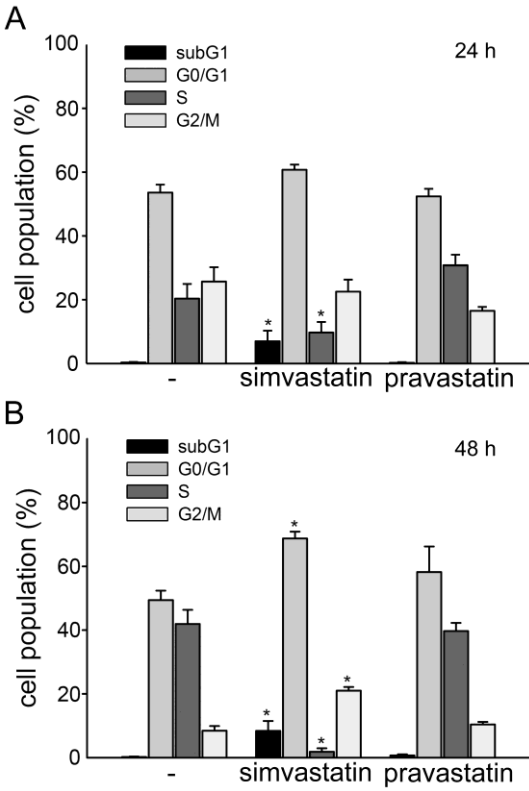

Supplement Fig. S2

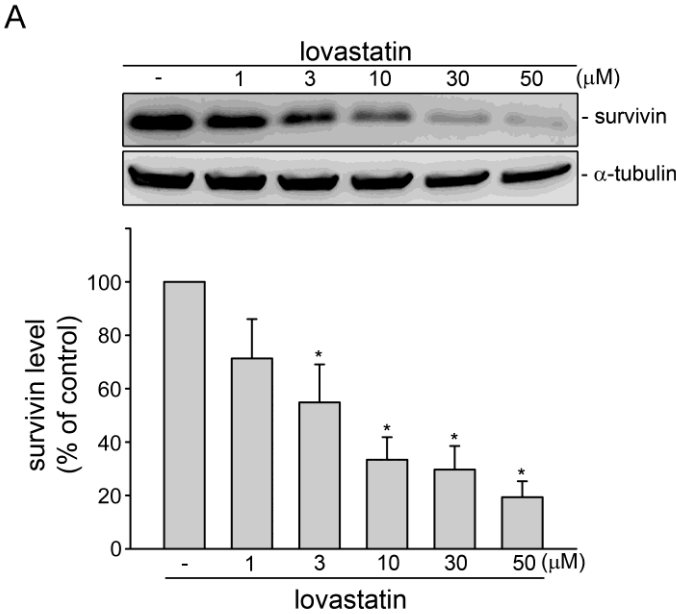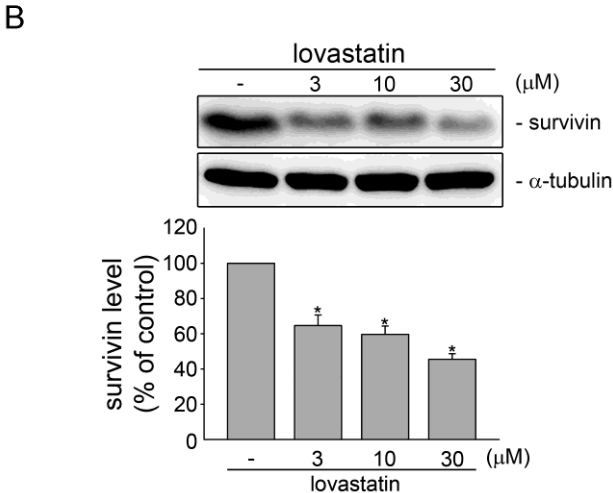

### Supplement Fig. S3

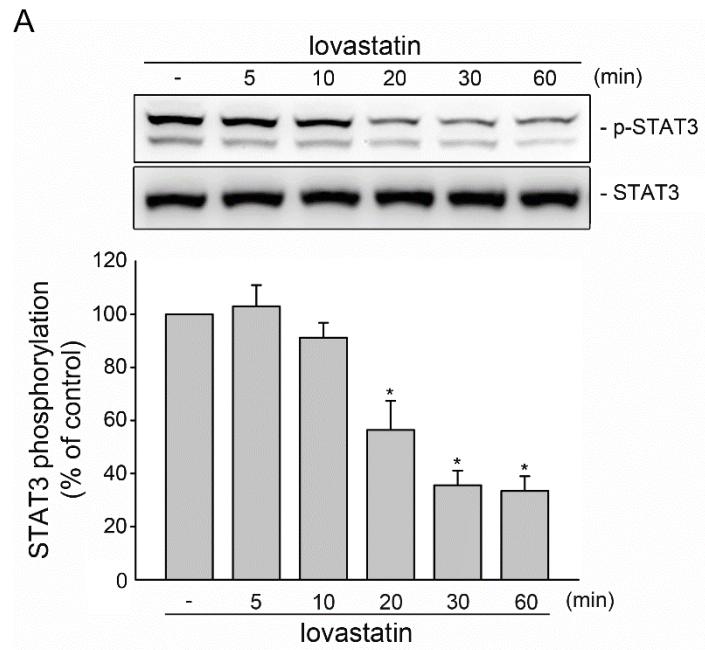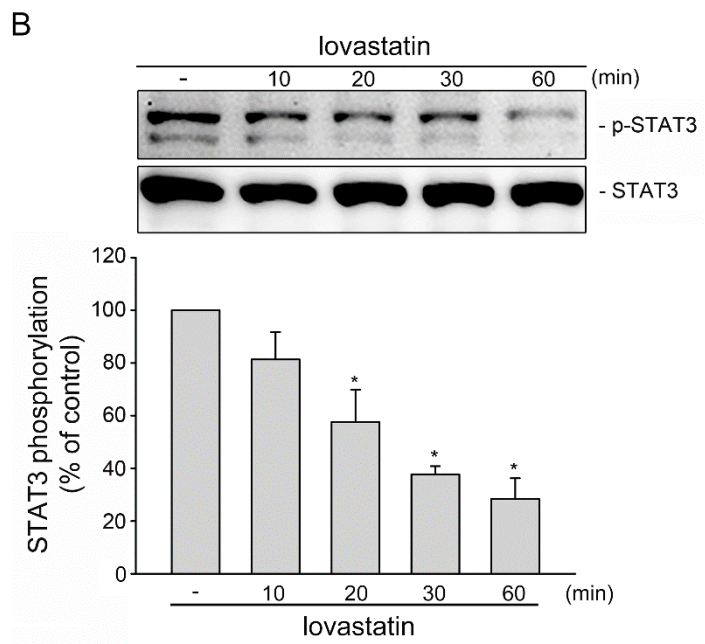

Supplement Fig. S4

A

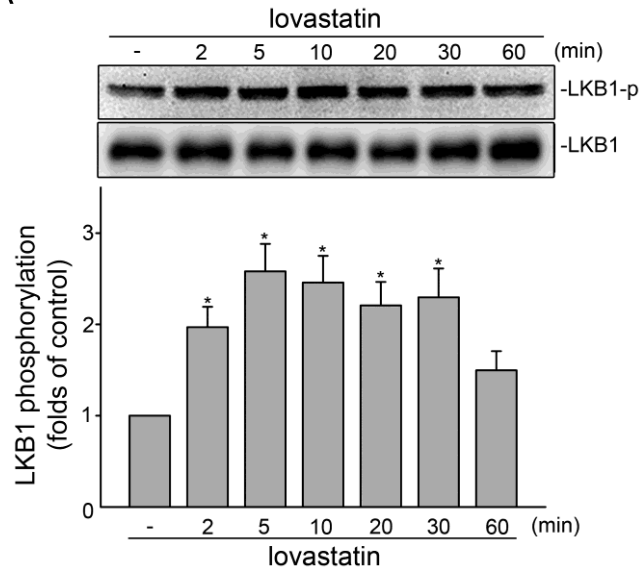

B

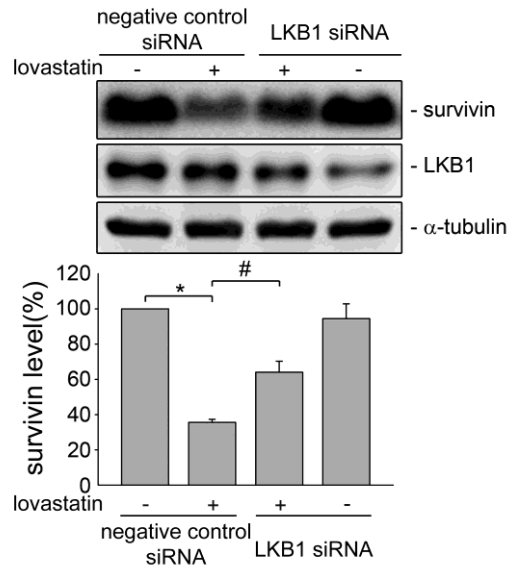

Supplement Fig. S5

A

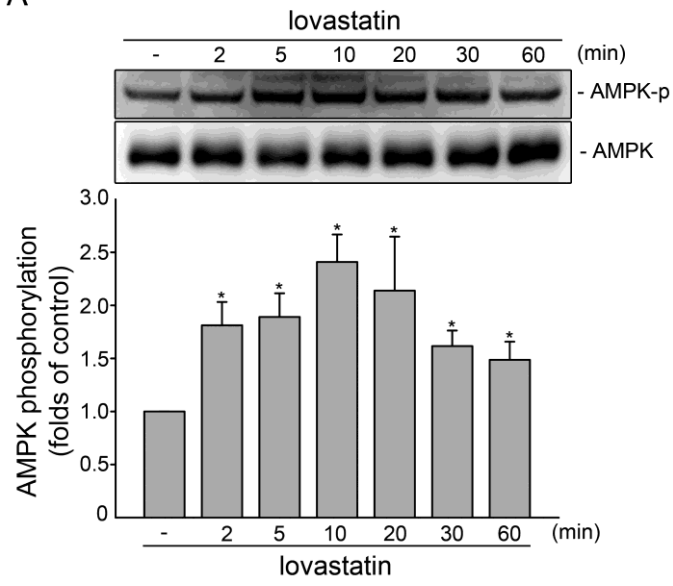

B

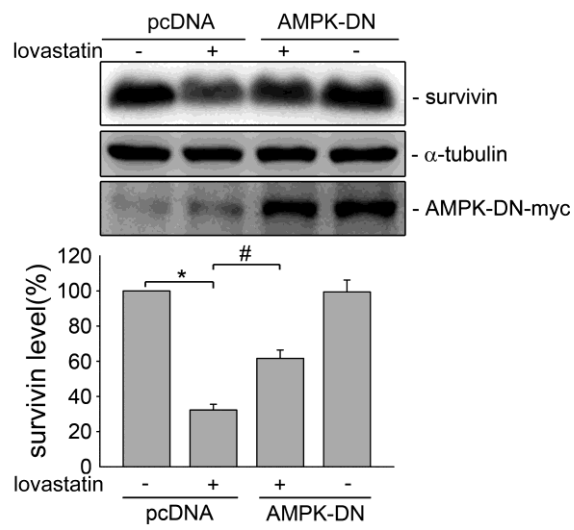

## Supplement Figure legends

**Supplement Figure S1. Effects of simvastatin and pravastatin on cell cycle progression or apoptosis in MCF-7 cells.** MCF-7 cells were treated with vehicle, simvastatin (30  $\mu$ M) or pravastatin (30  $\mu$ M) for 24 h (A) or 48 h (B). The percentage of propidium iodide-stained cells in subG1, G0/G1, S, and G2/M phases was analyzed by flowcytometry as described in the “*Materials and methods*” section. Each column represents the mean  $\pm$  S.E.M. of four independent experiments (Statistically significant differences were determined using one-way ANOVA, with Tukey’s post-hoc test.  $*p < 0.05$ , compared with the control group).

**Supplement Figure S2. Lovastatin caused survivin reduction in MDA-MB-468 and MDA-MB-231 cells.**

MDA-MB-468 (A) and MDA-MB-231 (B) cells were treated with vehicle or lovastatin at indicated concentrations for 24 h. Protein levels of survivin (MW 16 kDa) and  $\alpha$ -tubulin (MW 52 kDa) were determined by immunoblotting. Each column represents the mean  $\pm$  S.E.M. of six independent experiments (Statistically significant differences were determined using the Kruskal-Wallis test.  $*p < 0.05$ , compared with the control group).

**Supplement Figure S3. Lovastatin reduced STAT3 phosphorylation in MDA-MB-468 and MDA-MB-231 cells.** MDA-MB-231 (A) and MDA-MB-468 (B) cells were treated with vehicle or lovastatin at 30  $\mu$ M for the indicated periods. The phosphorylation status of STAT3 Tyr705 (MW 79, 86 kDa) was determined by immunoblotting. Each column represents the mean  $\pm$  SEM of five independent experiments. Statistically significant differences were determined using the Kruskal-Wallis test.  $*P < 0.05$ , compared with the control group.

**Supplement Figure S4. LKB1 contributes to lovastatin-induced survivin reduction in MDA-MB-231 cells.** (A) Cells were treated with vehicle or lovastatin at 30  $\mu$ M for indicated periods. The extent of LKB1 phosphorylation was determined by immunoblotting. Each column represents the mean  $\pm$  S.E.M. of six independent experiments (Statistically significant differences were determined using the Kruskal-Wallis test.  $*p < 0.05$ , compared with the control group). (B) Cells were transfected with negative control siRNA or LKB1 siRNA for 48 h. After transfection, cells were treated with vehicle or lovastatin (30  $\mu$ M) for another 24 h. The extent of survivin was determined by immunoblotting. Each column represents the mean  $\pm$  S.E.M. of six independent experiments (Statistically significant differences were determined using the Mann-Whitney test.  $*p < 0.05$ , compared with the vehicle-treated control group; # $p$

< 0.05, compared with the group treated with lovastatin alone).

**Supplement Figure S5. AMPK contributes to lovastatin-induced survivin reduction in MDA-MB-231 cells.** (A) Cells were treated with vehicle or lovastatin at 30  $\mu$ M for indicated periods. The extent of AMPK phosphorylation was determined by immunoblotting. Each column represents the mean  $\pm$  S.E.M. of six independent experiments (Statistically significant differences were determined using the Kruskal-Wallis test. \* $p$  < 0.05, compared with the control group). (B) Cells were transfected with pcDNA or AMPK-DN for 48 h. After transfection, cells were treated with vehicle or lovastatin (30  $\mu$ M) for another 24 h. The extent of survivin was determined by immunoblotting. Each column represents the mean  $\pm$  S.E.M. of six independent experiments (Statistically significant differences were determined using the Mann-Whitney test. \* $p$  < 0.05, compared with the vehicle-treated control group; # $p$  < 0.05, compared with the group treated with lovastatin alone).

# Service Report

## Customer Information:

Institute Graduate Institute of Medical Sciences,  
Taipei Medical University  
Name Dr. Hsu, Ming-Jen  
Report Date 2019.08.15

## Service Description:

|                                        |                                                                                                                                 |
|----------------------------------------|---------------------------------------------------------------------------------------------------------------------------------|
| <b>Service Name</b>                    | Mycoplasma Detection                                                                                                            |
| <b>Service Summary</b>                 | PCR based mycoplasma detection. Mycoplasma contamination is indicated by the presence of bands at approximately 370 bp -500 bp. |
| <b>Brand of Detection Kit</b>          | Abm                                                                                                                             |
| <b>Catalog Number of Detection Kit</b> | G238                                                                                                                            |
| <b>Name of Detection Kit</b>           | PCR Mycoplasma Detection Kit                                                                                                    |
| <b>Lot Number of Detection Kit</b>     | 0194844636001                                                                                                                   |
| <b>Sample(s) Information</b>           | A254 - A258                                                                                                                     |

## Detection Result:

| Service item         | Method | Result                      |
|----------------------|--------|-----------------------------|
| Mycoplasma Detection | PCR    | No Mycoplasma contamination |

## PCR 電泳結果圖

M: 100 bp DNA Ladder

N: Negative control

P: Positive control

A235: 549

A236: 231

A237: 468

A238: MCF7

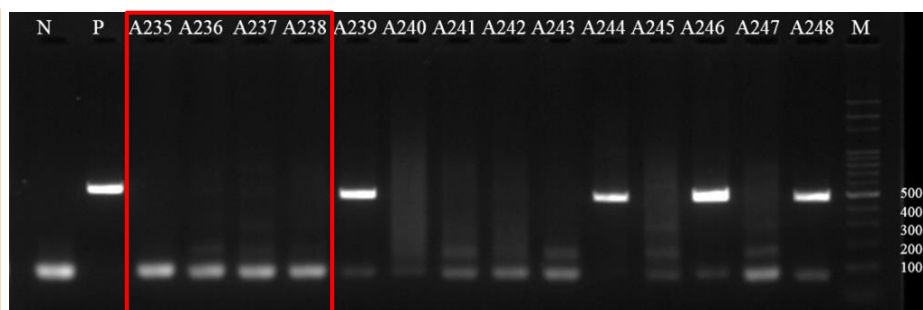



**Suggestions:** We recommend to use **InvivoGen, Plasmocin™** (Catalog number: **ANT-MPP**) to prevent Mycoplasma contamination.

**InvivoGen, Plasmocin™** product information: <https://www.invivogen.com/plasmocin>

# Mycoplasma Screening assay

PI: Hsu MJ

A549 cells  
MDA-MB-231 cells  
MDA-MB-468 cells  
MCF-7 cells

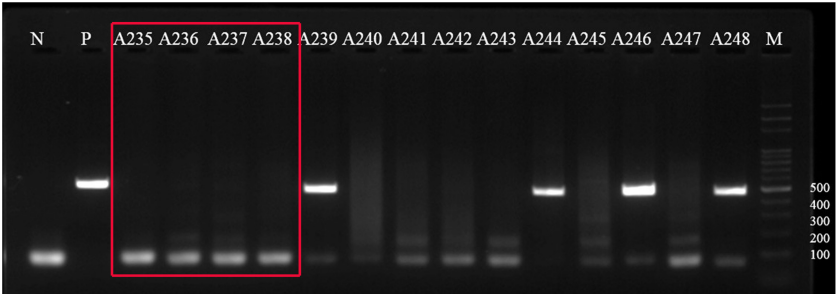

M: 100bp DNA ladder marker ; N: negative control; P:positivi control

**Genelabs Life Science Corp.**

12F.-6, No.3, Yuanqu St.,

Nangang Dist.,

Taipei City 115, Taiwan

TEL: +886-2-26557678

FAX: +886-2-26557572

E-mail: cellid@genelabs.com.tw

# Cell Line DNA Typing Report

Case Number: CID20190140

Report Date: 07/09/2019

**Sample Information:**

- i. Applicant Name: 許銘仁 Hsu Ming-Jen
- ii. Institution: 臺北醫學大學藥理學科 Department of Pharmacology, Taipei Medical University
- iii. Sample Description: MCF-7
- iv. Sample type: Cell Pellet
- v. Sample Received Date: 06/26/2019

**Test Description:**

DNA of the sample is extracted by Roche MagNA Pure Compact System.

DNA conc. = 151.9 ng/μl; OD260/280 = 2.03; OD260/230 = 2.14

The STR loci are amplified by Promega GenePrint® 24 System.

The CE analysis is performed on ABI PRISM 3730 GENETIC ANALYZER.

The raw data is analyzed by GeneMapper® Software V3.7.

The STR analysis is operated and reported by Mission Biotech.

This report is issued by:



Laboratory Director



General Manager

**STR Analysis Result:**

| ANSI/ATCC<br>ASN-0002<br>STR Loci | Repeat<br>Numbers | Extended<br>STR Loci | Repeat<br>Numbers | Extended<br>STR Loci                              | Repeat<br>Numbers |
|-----------------------------------|-------------------|----------------------|-------------------|---------------------------------------------------|-------------------|
| <b>D5S818</b>                     | 11,12             | D3S1358              | 16,16             | DYS391*                                           | N/A               |
| <b>D13S317</b>                    | 11,11             | D1S1656              | 15.3,15.3         | D8S1179                                           | 10,14             |
| <b>D7S820</b>                     | 8,9               | D2S441               | 10,14             | D12S391                                           | 18,20             |
| <b>D16S539</b>                    | 11,12             | D10S1248             | 14,14             | D19S433                                           | 13,14             |
| <b>vWA</b>                        | 14,15             | Penta E              | 7,12              | FGA                                               | 23,25             |
| <b>TH01</b>                       | 6,6               | D18S51               | 14,14             | D22S1045                                          | 15,16             |
| <b>Amelogenin</b>                 | X                 | D2S1338              | 23,23             | Case Number: CID20190140<br>Test Date: 07/05/2019 |                   |
| <b>TPOX</b>                       | 12,12             | Penta D              | 12,12             |                                                   |                   |
| <b>CSF1PO</b>                     | 10,10             | D21S11               | 30,30             |                                                   |                   |

# Allele Report

Case Number: CID20190140

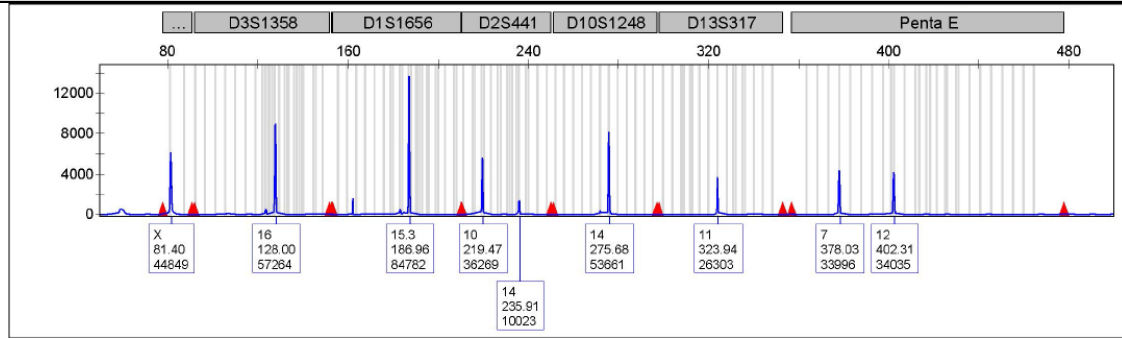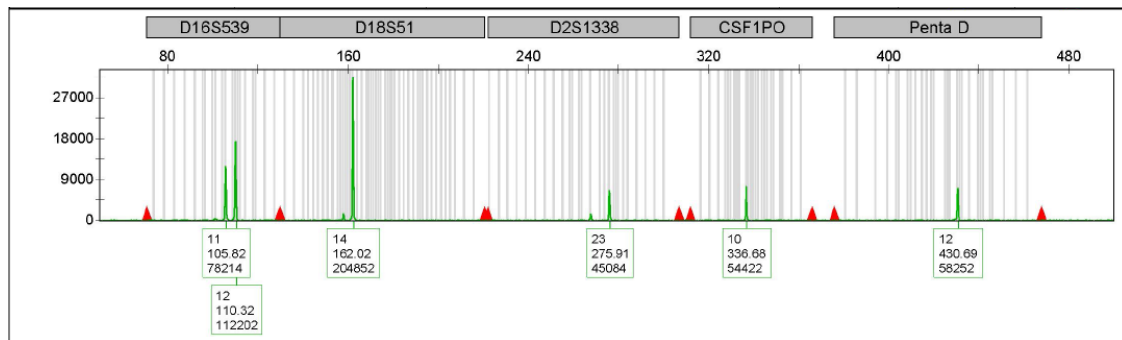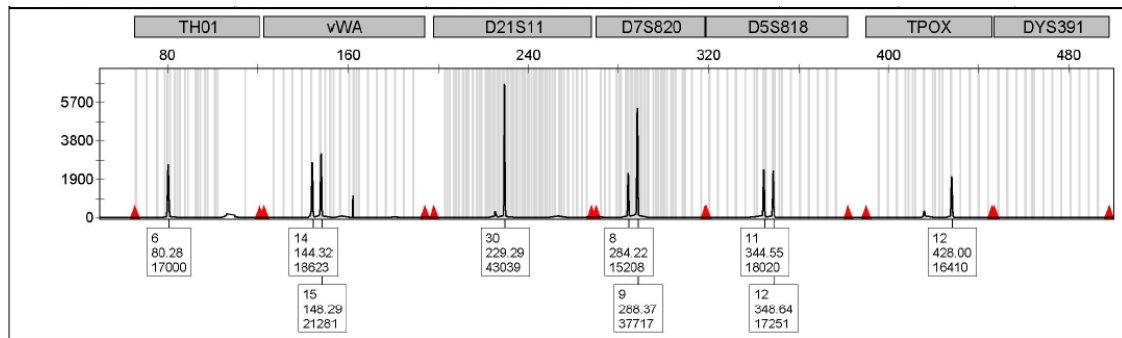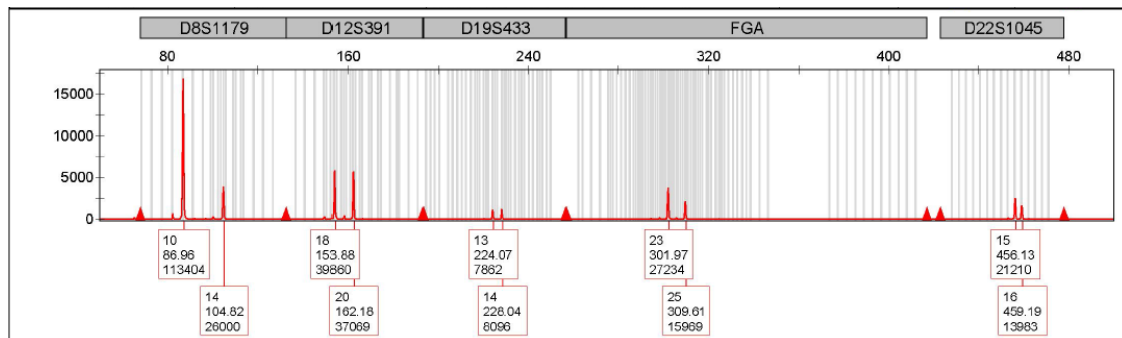

## Human Cell Line DNA Typing Report

|    | Dye  | Sample File Name  | Marker   | Allele | Size   | Height | Area   |
|----|------|-------------------|----------|--------|--------|--------|--------|
| 1  | B,1  | 008_A02_MCF-7.fsa | AMEL     | X      | 81.4   | 6228   | 44849  |
| 2  | B,2  | 008_A02_MCF-7.fsa | D3S1358  | 16     | 128    | 8999   | 57264  |
| 3  | B,3  | 008_A02_MCF-7.fsa | D1S1656  | 15.3   | 186.96 | 13750  | 84782  |
| 4  | B,4  | 008_A02_MCF-7.fsa | D2S441   | 10     | 219.47 | 5648   | 36269  |
| 5  | B,5  | 008_A02_MCF-7.fsa | D2S441   | 14     | 235.91 | 1535   | 10023  |
| 6  | B,6  | 008_A02_MCF-7.fsa | D10S1248 | 14     | 275.68 | 8209   | 53661  |
| 7  | B,7  | 008_A02_MCF-7.fsa | D13S317  | 11     | 323.94 | 3749   | 26303  |
| 8  | B,8  | 008_A02_MCF-7.fsa | Penta E  | 7      | 378.03 | 4419   | 33996  |
| 9  | B,9  | 008_A02_MCF-7.fsa | Penta E  | 12     | 402.31 | 4257   | 34035  |
| 10 | G,1  | 008_A02_MCF-7.fsa | D16S539  | 11     | 105.82 | 12108  | 78214  |
| 11 | G,2  | 008_A02_MCF-7.fsa | D16S539  | 12     | 110.32 | 17464  | 112202 |
| 12 | G,3  | 008_A02_MCF-7.fsa | D18S51   | 14     | 162.02 | 31483  | 204852 |
| 13 | G,4  | 008_A02_MCF-7.fsa | D2S1338  | 23     | 275.91 | 6684   | 45084  |
| 14 | G,5  | 008_A02_MCF-7.fsa | CSF1PO   | 10     | 336.68 | 7466   | 54422  |
| 15 | G,6  | 008_A02_MCF-7.fsa | Penta D  | 12     | 430.69 | 7217   | 58252  |
| 16 | Y,1  | 008_A02_MCF-7.fsa | TH01     | 6      | 80.28  | 2683   | 17000  |
| 17 | Y,2  | 008_A02_MCF-7.fsa | vWA      | 14     | 144.32 | 2738   | 18623  |
| 18 | Y,3  | 008_A02_MCF-7.fsa | vWA      | 15     | 148.29 | 3216   | 21281  |
| 19 | Y,4  | 008_A02_MCF-7.fsa | D21S11   | 30     | 229.29 | 6629   | 43039  |
| 20 | Y,5  | 008_A02_MCF-7.fsa | D7S820   | 8      | 284.22 | 2226   | 15208  |
| 21 | Y,6  | 008_A02_MCF-7.fsa | D7S820   | 9      | 288.37 | 5457   | 37717  |
| 22 | Y,7  | 008_A02_MCF-7.fsa | D5S818   | 11     | 344.55 | 2409   | 18020  |
| 23 | Y,8  | 008_A02_MCF-7.fsa | D5S818   | 12     | 348.64 | 2337   | 17251  |
| 24 | Y,9  | 008_A02_MCF-7.fsa | TPOX     | 12     | 428    | 2038   | 16410  |
| 25 | R,1  | 008_A02_MCF-7.fsa | D8S1179  | 10     | 86.96  | 16947  | 113404 |
| 26 | R,2  | 008_A02_MCF-7.fsa | D8S1179  | 14     | 104.82 | 4019   | 26000  |
| 27 | R,3  | 008_A02_MCF-7.fsa | D12S391  | 18     | 153.88 | 5947   | 39860  |
| 28 | R,4  | 008_A02_MCF-7.fsa | D12S391  | 20     | 162.18 | 5849   | 37069  |
| 29 | R,5  | 008_A02_MCF-7.fsa | D19S433  | 13     | 224.07 | 1198   | 7862   |
| 30 | R,6  | 008_A02_MCF-7.fsa | D19S433  | 14     | 228.04 | 1230   | 8096   |
| 31 | R,7  | 008_A02_MCF-7.fsa | FGA      | 23     | 301.97 | 3802   | 27234  |
| 32 | R,8  | 008_A02_MCF-7.fsa | FGA      | 25     | 309.61 | 2243   | 15969  |
| 33 | R,9  | 008_A02_MCF-7.fsa | D22S1045 | 15     | 456.13 | 2552   | 21210  |
| 34 | R,10 | 008_A02_MCF-7.fsa | D22S1045 | 16     | 459.19 | 1702   | 13983  |

**The comparison between case result and STR profile database:**

| Cell Name   | Locus name / STR Repeat Number |         |        |         |       |      |     |       |        | Match (%) | STR Profile Database* |
|-------------|--------------------------------|---------|--------|---------|-------|------|-----|-------|--------|-----------|-----------------------|
|             | D5S818                         | D13S317 | D7S820 | D16S539 | VWA   | TH01 | AM  | TPOX  | CSF1PO |           |                       |
| Test Sample | 11,12                          | 11,11   | 8,9    | 11,12   | 14,15 | 6,6  | X,X | 12,12 | 10,10  |           |                       |
| MCF-7       | 11,12                          | 11,11   | 8,9    | 11,12   | 14,15 | 6,6  | X,X | 9,12  | 10,10  | 94        | DSMZ                  |
| MCF7        | 11,12                          | 11,11   | 8,9    | 11,12   | 14,15 | 6,6  | X,X | 9,12  | 10,10  | 94        | DSMZ                  |
| KPL-1       | 11,12                          | 10,11   | 8,9    | 11,12   | 14,15 | 6,6  | X,X | 9,12  | 10,10  | 89        | DSMZ                  |

\* Online STR Analysis is performed on [https://www.atcc.org/STR\\_Database.aspx](https://www.atcc.org/STR_Database.aspx) (ATCC) or <https://www.dsmz.de/services/services-human-and-animal-cell-lines/online-str-analysis.html> (DSMZ)

\* This table just shows the top 10 cell lines within database those matches are ≥80%, and if there isn't any match ≥80%, it just shows the cell line which scores highest match with the test sample. If necessary, please utilize the online STR analysis on ATCC/DSMZ website for detailed comparison.

**The interpretation of comparison:**

Depending on the comparison, the highest 94% match is between the test sample and two cell lines (MCF-7, MCF7) within database, and there is another cell line those match is ≥80%.

Referring to ASN-0002-2011 (Authentication of Human Cell Lines: Standardization of STR Profiling), Cell line samples matching at ≥80% of alleles across the eight (8) core loci are said to be related, allowing authentication of the sample being tested. STR profiles are said to be unrelated when they match at <55% of alleles. STR profiles matching at 55-80% of alleles may be related and warrant further investigation as there may be overlap with a small number of cell lines that show marked genetic instability and slip below the 80% threshold.

- *This STR analysis service is for research purposes only, and any medical usage is not allowed.*

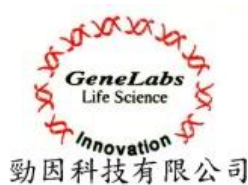

Genelabs Life science Corporation

[www.genelabs.com.tw](http://www.genelabs.com.tw)

Phone:(02)26557678, (04)22633813, (06)2094380

Freecall:0800-231914, 0800-094380

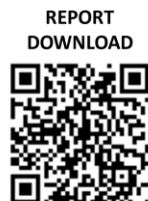

# Cell Line DNA Typing Report

**Mission Biotech**

10F-3, No.3, Yuanchi Street

Nangang, Taipei

Taiwan 115

Tel: 886 2 26557128

Email: service@missionbio.com.tw

Case Number: CID20130040

Report Date: 05/03/2013

## Sample Information:

- i. Applicant Name: Department of Pharmacology, School of Medicine, College of Medicine, Taipei Medical University
- ii. Institution: Ming-Jen Hsu
- iii. Sample Description: MDA-MB231
- iv. Sample type: Cell pellet
- v. Sample Received Date: 04/23/2013

## Allele table for the tested cell DNA

| STR Locus  | Repeat Numbers |
|------------|----------------|
| D5S818     | 12             |
| D13S317    | 13             |
| D7S820     | 8,9            |
| D16S539    | 12             |
| vWA        | 15,18          |
| TH01       | 7,9.3          |
| Amelogenin | X              |
| TPOX       | 8,9            |
| CSF1PO     | 12,13          |
| D21S11     | 30,33.2        |
| Mouse      | -              |

## Test Description:

Case Number: CID20130040

Test Date: 05/03/2013

Sample was extracted by Roche  
MagNA Pure Compact System.

DNA conc.= 124.2 ng/ulOD260/280 = 2.03OD260/230 = 2.15

This test was performed by using the  
Promega StemElite™ ID System and  
analyzed by ABI PRISM 3730 GENETIC  
ANALYZER and GeneMapper® Software  
V3.7.

Verified by:

Laboratory Director(Title)


05/06/2013

# Allele Report

Case Number: CID20130040

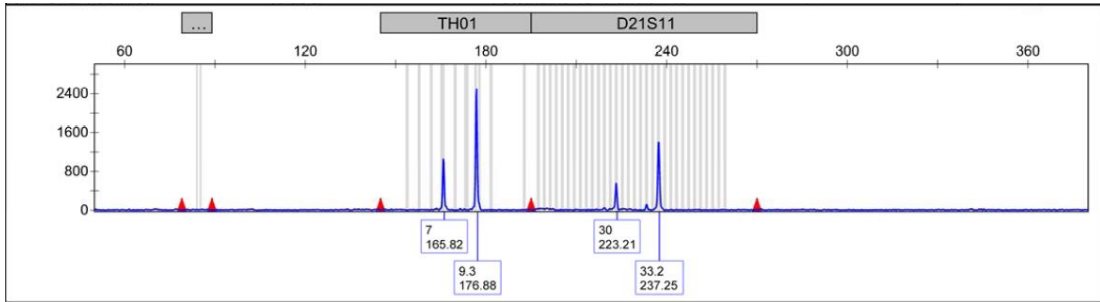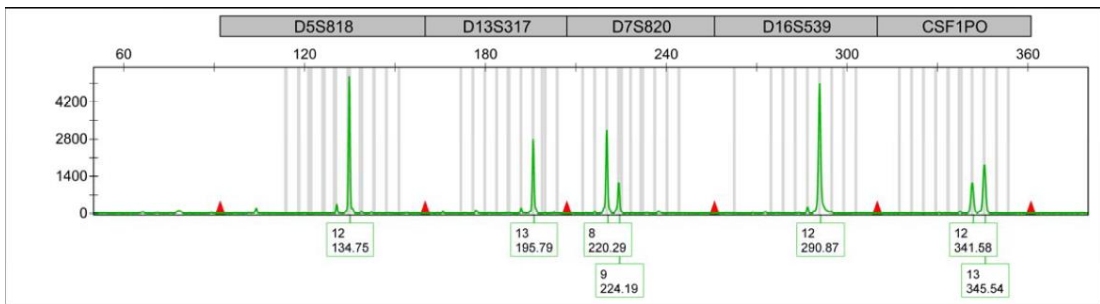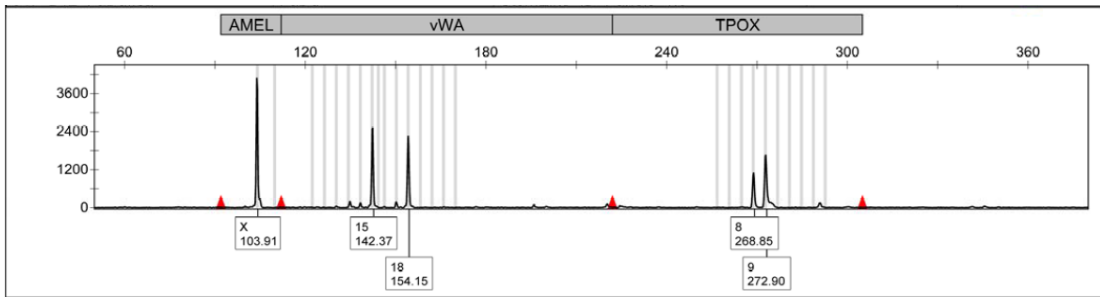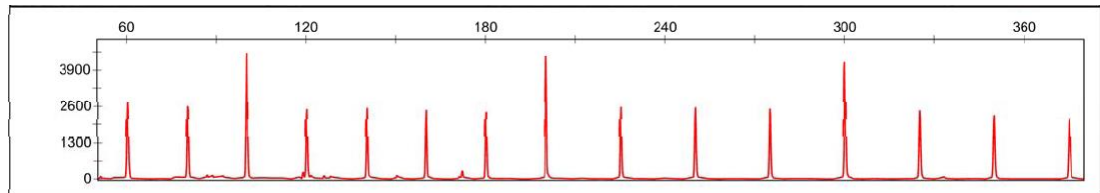



## Human Cell Line DNA Typing Report

|    | Dye | Sample File Name     | Marker  | Allele | Size   | Height | Area  |
|----|-----|----------------------|---------|--------|--------|--------|-------|
| 1  | B,1 | 047_B12_MDAMB231.fsa | TH01    | 7      | 165.82 | 1058   | 4552  |
| 2  | B,2 | 047_B12_MDAMB231.fsa | TH01    | 9.3    | 176.88 | 2485   | 10489 |
| 3  | B,3 | 047_B12_MDAMB231.fsa | D21S11  | 30     | 223.21 | 564    | 2477  |
| 4  | B,4 | 047_B12_MDAMB231.fsa | D21S11  | 33.2   | 237.25 | 1398   | 6844  |
| 5  | G,1 | 047_B12_MDAMB231.fsa | D5S818  | 12     | 134.75 | 5177   | 19429 |
| 6  | G,2 | 047_B12_MDAMB231.fsa | D13S317 | 13     | 195.79 | 2783   | 11789 |
| 7  | G,3 | 047_B12_MDAMB231.fsa | D7S820  | 8      | 220.29 | 3153   | 14684 |
| 8  | G,4 | 047_B12_MDAMB231.fsa | D7S820  | 9      | 224.19 | 1165   | 6149  |
| 9  | G,5 | 047_B12_MDAMB231.fsa | D16S539 | 12     | 290.87 | 4901   | 28753 |
| 10 | G,6 | 047_B12_MDAMB231.fsa | CSF1PO  | 12     | 341.58 | 1162   | 7735  |
| 11 | G,7 | 047_B12_MDAMB231.fsa | CSF1PO  | 13     | 345.54 | 1842   | 12601 |
| 12 | Y,1 | 047_B12_MDAMB231.fsa | AMEL    | X      | 103.91 | 4100   | 15268 |
| 13 | Y,2 | 047_B12_MDAMB231.fsa | vWA     | 15     | 142.37 | 2521   | 9916  |
| 14 | Y,3 | 047_B12_MDAMB231.fsa | vWA     | 18     | 154.15 | 2269   | 9040  |
| 15 | Y,4 | 047_B12_MDAMB231.fsa | TPOX    | 8      | 268.85 | 1108   | 5612  |
| 16 | Y,5 | 047_B12_MDAMB231.fsa | TPOX    | 9      | 272.9  | 1669   | 9860  |

# Allelic Ladder

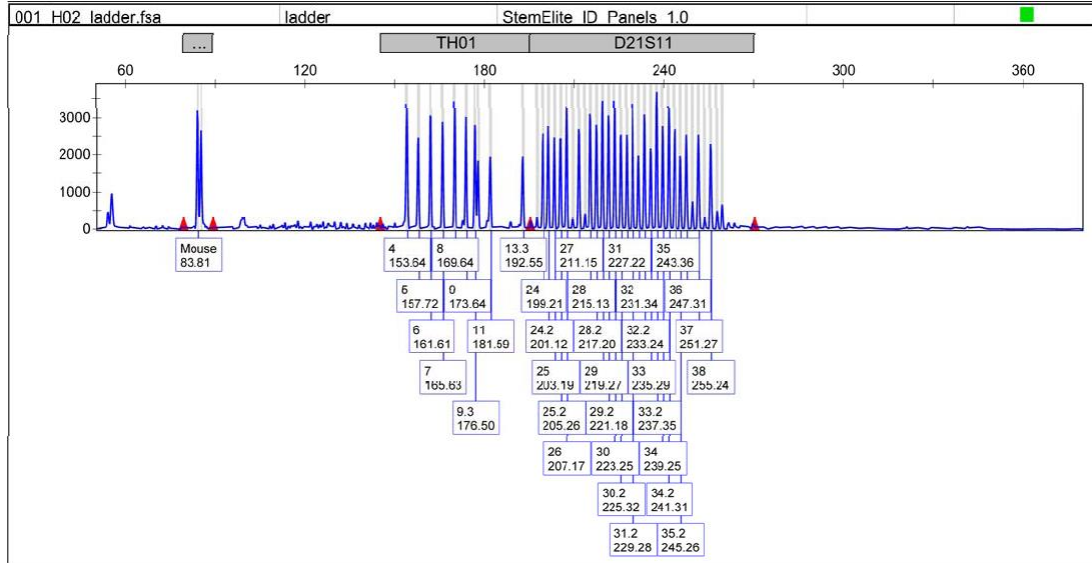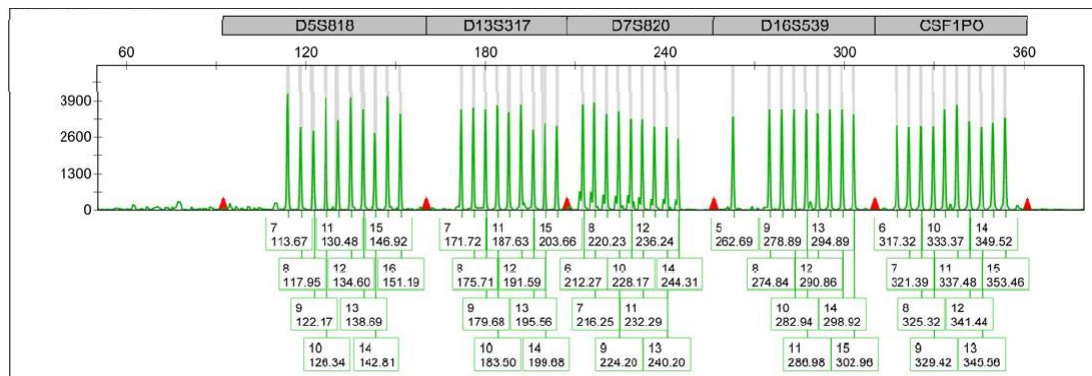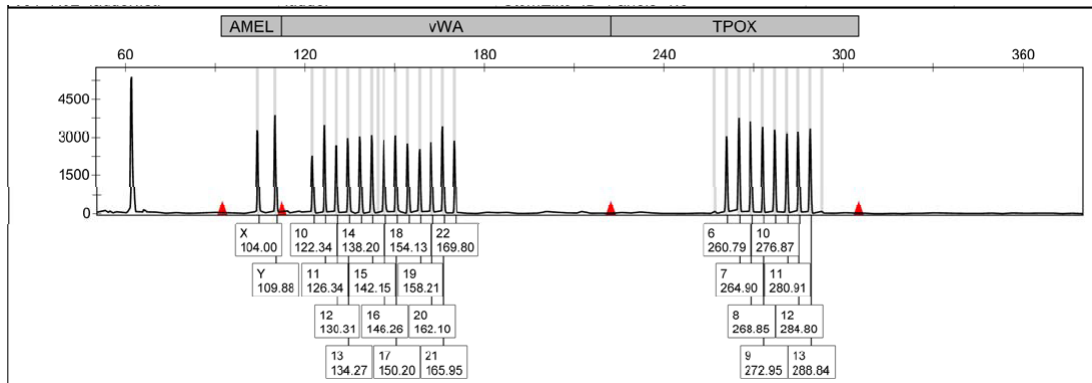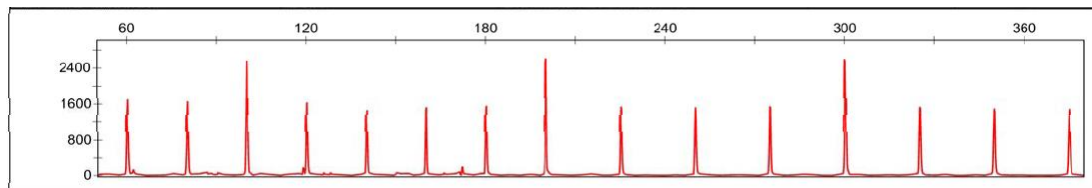

- *This STR analysis testing service is for research purposes only, and is not to be used for clinical diagnosis or applications involving humans.*
- *This test is just for typing the specific loci of the applied sample. The applicants may have to compare the results with the database of some bioresource institutes such as ATCC, JCRB or DSMZ by themselves.*

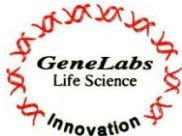

Genelabs Life science [www.genelabs.com.tw](http://www.genelabs.com.tw)

Phone:(02)26557678, (04)22633813, (06)2094380

Freecall:0800-231914,0800-094380

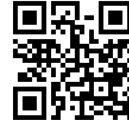

Supplement: JCMM-24-1822-s001.pdf [file JCMM-24-1822-s001.pdf]
